# Supplementary material for: Selective fluorescence sensing properties of a novel two-fold interpenetrating coordination polymer
Source: Royal Society of Chemistry journal article supplement (doi:10.1039/d0nj01750g), 2020-01-01
Supplement: d0nj01750g1.pdf [file d0nj01750g1.pdf]

## Content

- Table S1** Crystal data and structure refinement parameters of **1**.
- Table S2** Selected bond lengths (Å) and angles (°) for **1**.
- Table S3** Standard deviation and detection limit calculation for acetone, Fe<sup>3+</sup> and Cu<sup>2+</sup>.
- Table S4** Standard deviation and detection limit calculation for Cr<sub>2</sub>O<sub>7</sub><sup>2-</sup>, CrO<sub>4</sub><sup>2-</sup> and NZF.
- Table S5** Comparison of various CPs sensors for the detection of acetone.
- Table S6** Comparison of various CPs sensors for the detection of Fe<sup>3+</sup> and Cu<sup>2+</sup> ions.
- Table S7** Comparison of various CPs sensors for the detection of Cr<sub>2</sub>O<sub>7</sub><sup>2-</sup> and CrO<sub>4</sub><sup>2-</sup> ions.
- Table S8** Comparison of various CPs sensors for the detection of NFT.
- Table S9** HOMO and LUMO energy levels of selected antibiotics and H<sub>4</sub>L calculated by density functional theory (DFT) at B<sub>3</sub>LYP/6-31G\*\* level.
- Scheme S1** Schematic drawing of the ligands H<sub>4</sub>L and BIP.
- Scheme S2** The coordination mode of L<sup>4-</sup> ligand.
- Scheme S3** The structures of selected antibiotics.
- Figure S1** The IR spectra of **1**.
- Figure S2** The 1D [Zn(BIP)]<sub>n</sub> chain in **1**.
- Figure S3** The PXRD patterns of **1** before and after sensing tests.
- Figure S4** The TG curve of **1**.
- Figure S5** The solid state fluorescent emission spectra for **1**.
- Figure S6** (a) Emission spectra of **1** dispersed different solvent; (b) Emission spectra of **1** with different mixed solvents added acetone.
- Figure S7** UV-vis spectra of different solvent and the emission spectra of **1** in DMF solution.
- Figure S8** UV-vis spectra of different metal cations and the emission spectra of **1** in DMF solution.
- Figure S9** UV-vis spectra of different anions and the emission spectra of **1** in DMF solution.
- Figure S10** (a) UV-vis spectra of different antibiotics and the emission spectra of **1** in DMF solution; (b) The HOMO and LUMO energy levels for different antibiotics.

**Table S1** Crystal data and structure refinement parameters of **1**.

| <b>1</b>                                            |                                                                                 |
|-----------------------------------------------------|---------------------------------------------------------------------------------|
| Formula                                             | C <sub>42</sub> H <sub>31</sub> N <sub>11</sub> O <sub>10</sub> Zn <sub>2</sub> |
| Formula weight                                      | 980.56                                                                          |
| Crystal system                                      | Orthorhombic                                                                    |
| Space group                                         | <i>P bcn</i>                                                                    |
| <i>a</i> (Å)                                        | 12.0157(13)                                                                     |
| <i>b</i> (Å)                                        | 18.1093(19)                                                                     |
| <i>c</i> (Å)                                        | 18.990(2)                                                                       |
| $\alpha$ (°)                                        | 90                                                                              |
| $\beta$ (°)                                         | 90                                                                              |
| $\gamma$ (°)                                        | 90                                                                              |
| Volume (Å <sup>3</sup> )                            | 4132.2(8)                                                                       |
| <i>Z</i>                                            | 4                                                                               |
| <i>T</i> (K)                                        | 296(2)                                                                          |
| <i>D</i> <sub>calcd</sub> (mg·m <sup>-3</sup> )     | 1.576                                                                           |
| $\mu$ (mm <sup>-1</sup> )                           | 1.235                                                                           |
| <i>R</i> <sub>int</sub>                             | 0.0585                                                                          |
| <i>F</i> (000)                                      | 2000                                                                            |
| $\theta$ range (°)                                  | 2.034 ≤ $\theta$ ≤ 26.000                                                       |
| Reflns. collected                                   | 41035                                                                           |
| Data / restraints / parameters                      | 4066 / 0 / 294                                                                  |
| Goodness of fit on <i>F</i> <sup>2</sup>            | 0.996                                                                           |
| Final <i>R</i> indices [ <i>I</i> > 2σ( <i>I</i> )] | <i>R</i> <sub>1</sub> = 0.0470, <i>wR</i> <sub>2</sub> = 0.1281                 |
| <i>R</i> indices (all data)                         | <i>R</i> <sub>1</sub> = 0.0718, <i>wR</i> <sub>2</sub> = 0.1394                 |
| Largest diff. peak and hole (e Å <sup>-3</sup> )    | 0.614 and -0.646                                                                |

$$R_1 = \frac{\sum |F_o| - |F_c|}{\sum |F_o|}, \quad \omega R_2 = \frac{\sum [w(F_o^2 - F_c^2)^2]}{\sum [w(F_o^2)]^{1/2}}$$

**Table S2** Selected bond lengths (Å) and angles (°) for **1**.

| <b>1</b>                      |            |                                             |            |
|-------------------------------|------------|---------------------------------------------|------------|
| Zn(1)-O(1)                    | 1.935(3)   | Zn(1)-O(4) <sup>ii</sup>                    | 1.930(3)   |
| Zn(1)-N(1)                    | 2.029(3)   | Zn(1)-N(3) <sup>i</sup>                     | 1.997(3)   |
| O(1)-Zn(1)-N(1)               | 94.97(12)  | O(1)-Zn(1)-N(3) <sup>i</sup>                | 107.15(14) |
| O(1)-Zn(1)-O(4) <sup>ii</sup> | 116.03(12) | N(1)-Zn(1)-N(3) <sup>i</sup>                | 107.37(14) |
| N(1)-Zn(1)-O(4) <sup>ii</sup> | 113.50(13) | N(3) <sup>i</sup> -Zn(1)-O(4) <sup>ii</sup> | 115.64(14) |

Symmetry codes: i: 1/2+x, -1/2+y, 1/2-z; ii: 3/2-x, -1/2+y, z.

**Table S3** Standard deviation and detection limit calculation for acetone, Fe<sup>3+</sup> and Cu<sup>2+</sup>.

|                                 | acetone               | Fe <sup>3+</sup>      | Cu <sup>2+</sup>      |
|---------------------------------|-----------------------|-----------------------|-----------------------|
| 1                               | 674.964623            | 676.910132            | 679.979652            |
| 2                               | 674.713217            | 676.712265            | 679.571873            |
| 3                               | 674.771354            | 677.099955            | 679.711342            |
| 4                               | 674.572372            | 676.633277            | 679.791236            |
| 5                               | 675.113253            | 677.094345            | 680.021875            |
| Standard deviation ( $\sigma$ ) | 0.19066               | 0.1917                | 0.16753               |
| Slope (m)                       | $6.79 \times 10^4$    | $2.93 \times 10^4$    | $1.39 \times 10^4$    |
| Detection limit ( $3\sigma/m$ ) | $8.42 \times 10^{-6}$ | $1.96 \times 10^{-5}$ | $3.62 \times 10^{-5}$ |

**Table S4** Standard deviation and detection limit calculation for  $\text{Cr}_2\text{O}_7^{2-}$ ,  $\text{CrO}_4^{2-}$  and NZF.

|                                 | $\text{Cr}_2\text{O}_7^{2-}$ | $\text{CrO}_4^{2-}$   | NZF                   |
|---------------------------------|------------------------------|-----------------------|-----------------------|
| 1                               | 680.438512                   | 687.891131            | 640.928032            |
| 2                               | 680.417532                   | 687.654376            | 641.072251            |
| 3                               | 680.731543                   | 687.982273            | 640.701342            |
| 4                               | 680.271586                   | 687.512145            | 640.691276            |
| 5                               | 680.831653                   | 687.992165            | 641.1921367           |
| Standard deviation ( $\sigma$ ) | 0.20932                      | 0.19095               | 0.19869               |
| Slope (m)                       | $2.84 \times 10^4$           | $1.87 \times 10^4$    | $1.59 \times 10^4$    |
| Detection limit ( $3\sigma/m$ ) | $2.21 \times 10^{-5}$        | $3.06 \times 10^{-5}$ | $3.75 \times 10^{-5}$ |

**Table S5** Comparison of various CPs sensors for the detection of acetone.

|    | Analyte | CPs-based fluorescent Materials                   | Quenching constant ( $K_{SV}$ , $M^{-1}$ ) | Detection Limits (LOD) | Media    | Ref   |
|----|---------|---------------------------------------------------|--------------------------------------------|------------------------|----------|-------|
| 1  | acetone | $[Cd_3(cpota)_2(phen)_3]_n \cdot 5nH_2O$          | $78 M^{-1}$                                | $1.57 \times 10^{-4}M$ | $H_2O$   | 18(a) |
| 2  |         | $[Cd_3(L^1)_2(BTB)_2(H_2O)] \cdot DMF \cdot H_2O$ | 3.3146                                     | 0.122 vol%             | $CH_3CN$ | 18(b) |
| 3  |         | $\{[Cd(pta)] \cdot H_2O\}_n$                      | $6.37 \times 10^3 M^{-1}$                  | 0.0825 vol% (825 ppm)  | $H_2O$   | 18(c) |
| 4  |         | $[Cd(L^1)(oba)] \cdot DMF$                        | $1.169 M^{-1}$                             |                        | $DMF$    | 18(d) |
| 5  |         | $[Zn_2(L^1)_2(HBPT)_2] \cdot H_2O$                | $0.7006 M^{-1}$                            |                        |          |       |
| 6  |         | $\{[Cd(bct)(tib)] \cdot H_2O \cdot DMF\}_n$       | $12.89 M^{-1}$                             |                        | $H_2O$   | 18(e) |
| 7  |         | $[Zn_5(L)_4(H_2tpim)_2(FA)_4(H_2O)_2]_n$          | $3.948 mM^{-1}$                            |                        | $DMF$    | 18(f) |
| 8  |         | $[Zn(L)(Htpim)]_n$                                | $3.138 mM^{-1}$                            |                        |          |       |
| 9  |         | $[Zn(L)(Htpim)]_n$                                | $1.731 mM^{-1}$                            |                        |          |       |
| 10 |         | $\{[Cd(H_2O)_4(4-BPDB)][BPDC]\}_n$                | $13.57 M^{-1}$                             | 0.15 mM                | $CH_3CN$ | 18(g) |
| 11 |         | $[Zn(L)(bpdc)] \cdot 1.6H_2O$                     | 0.4788                                     | 0.0478 vol%            | $DMF$    | 18(h) |
| 12 |         | $[Cd_2(L)(Hbptc)_2]$                              | 0.4918                                     | 0.0465 vol%            |          |       |
| 13 |         | $[Zn_2(H_2BCA)_2(o-bimb)_2(H_2O)_2]_n$            | $3.7 \times 10^4 M^{-1}$                   | 0.09 $\mu M$           | $H_2O$   | 18(i) |
| 14 |         | $\{[Zn(H_2BCA)(m-bib)] \cdot H_2O\}_n$            | $2.0 \times 10^4 M^{-1}$                   | 0.13 $\mu M$           |          |       |

$H_3cpota$  = 2-(4-carboxyphenoxy)terephthalic acid, phen = 1,10-phenanthroline;  $L^1=1, 3$ -di(1H-imidazol-4-yl)benzene,  $H_3BTB=1,3,5$ -tri(4-carboxyphenyl)benzene;  $H_2pta$  = 2-(4-pyridyl)-terephthalic acid;  $L^1=1,3$ -di(1H-imidazol-4-yl)benzene,  $H_2oba$  = 4,4'-oxybis-(benzoic acid),  $H_4BPTC$  = biphenyl-3,3',5,5'-tetracarboxylic acid;  $H_2bct=3,5$ -bis(4'-carboxyphenyl)-1,2,4-triazole,  $tib$  = 1,3,5-tris(1-imidazolyl)benzene;  $H_2L=5$ -nitroisophthalic acid,  $Htpim=2,4,5$ -tri(4-pyridyl)-imidazole,  $HFA$  = formic acid;  $4-BPDB=1,4$ -bis(4-pyridyl)-2,3-diaza-1,3-butadiene,  $H_2BPDC=4,4'$ -biphenyldicarboxylic acid;  $H_2bpdc=4,4'$ -benzophenonedicarboxylic acid,  $H_3bptc$  = biphenyl-2,4',5-tricarboxylic acid,  $L=1,4$ -di(1H-imidazol-4-yl)benzene;

H<sub>2</sub>BCA=bis(4-carboxybenzyl)amine, o-bimb = 1,2-bis(imidazol-1-ylmethyl) benzene), m-bib = 1,3-bis(1-imidazolyl)benzene.

**Table S6** Comparison of various CPs sensors for the detection of Fe<sup>3+</sup> and Cu<sup>2+</sup> ions.

|   | Analyte          | CPs-based fluorescent Materials                                                                                                         | Quenching constant (K <sub>SV</sub> , M <sup>-1</sup> ) | Detection Limits (LOD)        | Media            | Ref   |
|---|------------------|-----------------------------------------------------------------------------------------------------------------------------------------|---------------------------------------------------------|-------------------------------|------------------|-------|
| 1 | Fe <sup>2+</sup> | [Mg <sub>2</sub> (APDA) <sub>2</sub> (H <sub>2</sub> O) <sub>3</sub> ]·5DMA·5H <sub>2</sub> O                                           | 2.06 × 10 <sup>4</sup>                                  | 152 ppb                       | DMF              | 19(a) |
| 2 |                  | {Eu <sub>2</sub> L <sub>3</sub> (DMF)}·2DMF                                                                                             | 4 × 10 <sup>4</sup>                                     | 6.62 μM                       | H <sub>2</sub> O | 19(b) |
| 3 |                  | [Ag(CIP <sup>-</sup> )]                                                                                                                 | 7.1 × 10 <sup>3</sup>                                   | 1.2 × 10 <sup>-6</sup> M      | H <sub>2</sub> O | 19(c) |
| 4 |                  | [Zn(ACA) <sub>4</sub> ]·CB[6]·[NH <sub>2</sub> (CH <sub>3</sub> ) <sub>2</sub> ]·8H <sub>2</sub> O                                      | 1.088 × 10 <sup>4</sup>                                 | 9.5 × 10 <sup>-7</sup> M      | H <sub>2</sub> O | 19(d) |
| 5 |                  | {[Eu <sub>2</sub> (L) <sub>2</sub> (H <sub>2</sub> O) <sub>2</sub> ]·5H <sub>2</sub> O·6DMAC} <sub>n</sub>                              | 5941 M                                                  | 10 <sup>-5</sup> mM           | H <sub>2</sub> O | 19(e) |
| 6 |                  | [Ln <sub>2</sub> (L <sup>1</sup> ) <sub>2</sub> (H <sub>2</sub> O) <sub>4</sub> ]·2H <sub>2</sub> O                                     |                                                         | 10 <sup>-6</sup> M            | H <sub>2</sub> O | 19(f) |
| 7 |                  | [Tb(HMDIA)(H <sub>2</sub> O) <sub>3</sub> ]·H <sub>2</sub> O                                                                            | 1.6 × 10 <sup>4</sup> M <sup>-1</sup>                   |                               | H <sub>2</sub> O | 19(g) |
| 1 | Cu <sup>2+</sup> | {[BaCd(μ <sub>6</sub> -tp) <sub>1.5</sub> (μ <sub>2</sub> -Cl)(H <sub>2</sub> O)(DMF) <sub>2</sub> ]·0.75H <sub>2</sub> O} <sub>n</sub> | 1.15 × 10 <sup>4</sup> M <sup>-1</sup>                  | 0.26 μM                       | H <sub>2</sub> O | 20(a) |
| 2 |                  | {Cd(INA)(pytpy)(OH)·2H <sub>2</sub> O} <sub>n</sub>                                                                                     | 1.3 × 10 <sup>5</sup> M <sup>-1</sup>                   | 3.98 × 10 <sup>-3</sup> mM    | H <sub>2</sub> O | 20(b) |
| 3 |                  | [Cd(L)]·2DMF                                                                                                                            | 4.1 × 10 <sup>3</sup> M <sup>-1</sup>                   |                               | DMF              | 20(c) |
| 4 |                  | {[Zn(btca)(py) <sub>2</sub> ]} <sub>n</sub>                                                                                             | 2.92 × 10 <sup>4</sup> M <sup>-1</sup>                  | 3 ppm                         | H <sub>2</sub> O | 20(d) |
| 5 |                  | {Eu <sub>2</sub> (TBrTA) <sub>3</sub> (H <sub>2</sub> O) <sub>8</sub> ·2H <sub>2</sub> O} <sub>n</sub>                                  | 4612.0 M <sup>-1</sup>                                  | 7.52 × 10 <sup>-5</sup> mol/L | ethanol          | 20(e) |
| 6 |                  | {[Ln <sub>3</sub> Ag <sub>3</sub> (BPDC) <sub>5</sub> (OX)(H <sub>2</sub> O) <sub>7</sub> ]·7H <sub>2</sub> O} <sub>n</sub>             | 4674 M <sup>-1</sup>                                    |                               | ethanol          | 20(f) |
| 7 |                  | Cd <sub>2</sub> (dhtp)(DMF) <sub>2</sub>                                                                                                | 1806 M <sup>-1</sup>                                    |                               | H <sub>2</sub> O | 20(g) |
| 8 |                  | [Cd(L)(TPOM) <sub>0.75</sub> ]·xS                                                                                                       | 17890 M <sup>-1</sup>                                   |                               | H <sub>2</sub> O | 20(h) |

H<sub>2</sub>APDA= 4,4'-(4-aminopyridine-3,5-diyl)dibenzoic acid;

L=(6-[1-(4-carboxyphenyl)-1H-1,2,3-triazol-4-yl]nicotinic acid);

HCIP = 4-(4-carboxylphenyl)-2,6-di(4-imidazol-1-yl)phenylpyridine;

CB[6]=cucurbit[6]uril, HACA = anthracene-9-carboxylic acid;

H<sub>3</sub>L = 4,4'-(((5-carboxy-1,3-phenylene)bis(azanediyl))bis(carbonyl)) dibenzoic acid, DMAC = N,N'-dimethylacetamide;

H<sub>4</sub>MDIA=5,5'-methylenediisophthalic acid;

H<sub>2</sub>tp = terephthalic acid;



pytpy = 4'-(4-Pyridinyl)-2,2':6',2''-terpyridine, INA = Isonicotinic acid;

L= 5,5',5''-((1,3,5-triazine-2,4,6-triyl)tris(azanediy))tris(3-methylbenzoic acid);

H<sub>2</sub>btca = benzotriazole-5-carboxylic acid, py = pyridine;

H<sub>2</sub>TBrTA= tetrabromoterephthalic acid;

H<sub>2</sub>BPDC=2,2'-bipyridine-3,3'-dicarboxylic acid, H<sub>2</sub>OX= oxalic acid; H<sub>2</sub>dhtp =2,5-dihydroxy-1,4-benzenedicarboxylic acid;

TPOM = tetrakis(4-pyridyloxy-methylene) methane.

**Table S7** Comparison of various CPs sensors for the detection of Cr<sub>2</sub>O<sub>7</sub><sup>2-</sup> and CrO<sub>4</sub><sup>2-</sup> ions.

|   | Analyte                                      | CPs-based fluorescent Materials                                                                                                               | Quenching constant (K <sub>SV</sub> , M <sup>-1</sup> ) | Detection Limits (DL)      | Media            | Ref   |
|---|----------------------------------------------|-----------------------------------------------------------------------------------------------------------------------------------------------|---------------------------------------------------------|----------------------------|------------------|-------|
| 1 | Cr <sub>2</sub> O <sub>7</sub> <sup>2-</sup> | [H <sub>2</sub> N(CH <sub>3</sub> ) <sub>2</sub> ] <sub>2</sub> [Zn <sub>2</sub> L(HPO <sub>3</sub> ) <sub>2</sub> ]                          | 4.44 × 10 <sup>4</sup>                                  | 1.09 × 10 <sup>-3</sup> mM | H <sub>2</sub> O | 20(a) |
| 2 |                                              | [Tb(ppda)(bdc) <sub>0.5</sub> (C <sub>2</sub> H <sub>5</sub> OH)(H <sub>2</sub> O)] <sub>n</sub>                                              | 4.03 × 10 <sup>3</sup>                                  | 5.0 × 10 <sup>-5</sup> M   | DMF              | 20(b) |
| 3 |                                              | {[(CH <sub>3</sub> ) <sub>2</sub> NH <sub>2</sub> ] <sub>2</sub> [Zn <sub>5</sub> (TDA) <sub>4</sub> TZ <sub>4</sub> ]<br>□4DMF} <sub>n</sub> | 6.77 × 10 <sup>3</sup>                                  | 7.48 μmol L <sup>-1</sup>  | H <sub>2</sub> O | 20(c) |
| 4 |                                              | [Cd <sub>3</sub> (cpota) <sub>2</sub> (phen) <sub>3</sub> ] <sub>n</sub> ·5nH <sub>2</sub> O                                                  | 1.21 × 10 <sup>4</sup>                                  | 3.70 × 10 <sup>-7</sup> M  | H <sub>2</sub> O | 20(d) |
| 5 |                                              | [Zn(NH <sub>2</sub> -bdc)(4,4'-bpy)]                                                                                                          | 7.62 × 10 <sup>3</sup>                                  | 1.30 μM                    | H <sub>2</sub> O | 20(e) |
| 6 |                                              | {[Cd <sub>2</sub> L <sub>2</sub> (H <sub>2</sub> O) <sub>4</sub> ]·H <sub>2</sub> O} <sub>n</sub>                                             | 1.25 × 10 <sup>4</sup>                                  | 3.7 μM                     | H <sub>2</sub> O | 20(f) |
| 7 |                                              | {[Zn <sub>2</sub> L <sub>2</sub> (H <sub>2</sub> O) <sub>4</sub> ]·H <sub>2</sub> O} <sub>n</sub>                                             | 1.77 × 10 <sup>4</sup>                                  | 2.6 μM                     | H <sub>2</sub> O |       |
| 1 | CrO <sub>4</sub> <sup>2-</sup>               | [Cd <sub>1.5</sub> (L) <sub>2</sub> (bpy)(NO <sub>3</sub> )]·2DMF·2H <sub>2</sub> O                                                           | 1.73 × 10 <sup>4</sup>                                  | 280 ppb                    | H <sub>2</sub> O | 21(a) |
| 2 |                                              | [Zn <sub>2</sub> (TPOM)(NDC) <sub>2</sub> ] <sub>2</sub> ·3.5H <sub>2</sub> O                                                                 | 7.81 × 10 <sup>3</sup>                                  | 2.50 μM                    | H <sub>2</sub> O | 21(b) |
| 3 |                                              | {[Zn(L) <sub>0.5</sub> (bimb)]·2H <sub>2</sub> O·0.5(CH <sub>3</sub> ) <sub>2</sub> NH <sub>2</sub> ] <sub>n</sub>                            | 5.04 × 10 <sup>4</sup>                                  | 0.60 μM                    | H <sub>2</sub> O | 21(c) |
| 4 |                                              | [Ni(ppvppa)(5-NO <sub>2</sub> -1,3-BDC)(H <sub>2</sub> O)]·0.5MeCN                                                                            | 210526                                                  | 0.09 ppb                   | H <sub>2</sub> O | 21(d) |
| 5 |                                              | {[Cd <sub>2</sub> L <sub>2</sub> (H <sub>2</sub> O) <sub>4</sub> ]·H <sub>2</sub> O} <sub>n</sub>                                             | 1.21 × 10 <sup>4</sup>                                  | 3.8 μM                     | H <sub>2</sub> O | 21(e) |
| 6 |                                              | {[Zn <sub>2</sub> L <sub>2</sub> (H <sub>2</sub> O) <sub>4</sub> ]·H <sub>2</sub> O} <sub>n</sub>                                             | 1.95 × 10 <sup>4</sup>                                  | 2.3 μM                     |                  |       |
| 7 |                                              | [Eu <sub>7</sub> (mtb) <sub>5</sub> (H <sub>2</sub> O) <sub>16</sub> ]·NO <sub>3</sub> ·8DMA·18H <sub>2</sub> O                               | 3.3 × 10 <sup>4</sup>                                   |                            | H <sub>2</sub> O | 21(f) |

H<sub>2</sub>L=2',3',5',6'-tetramethyl-[1,1':4',1''-terphenyl]-4,4''-dicarboxylic acid;

H<sub>2</sub>ppda=4-(pyridin-3-yloxy)-phthalic acid, H<sub>2</sub>bdc=terephthalic acid;

H<sub>2</sub>TDA = thiophene-2,5-dicarboxylic acid, HTZ = 1H-1,2,4-Triazole;

H<sub>3</sub>cpota = 2-(4-carboxyphenoxy)terephthalic acid, phen = 1,10-phenanthroline;

NH<sub>2</sub>-H<sub>2</sub>bdc = 2-amino-1,4-benzenedicarboxylic acid, 4,4'-bpy = 4,4'-bipyridine;

H<sub>2</sub>L = 5-(1H-1,2,4-triazol-1-yl)isophthalic acid);

HL = 4-(4-carboxyphenyl)-1,2,4-triazole, bpy = 4,4'-bipyridine;

TPOM = tetrakis(4-pyridyloxymethylene)methane, H<sub>2</sub>ndc = 2,6-naphthalenedicarboxylic acid;

ppvppa = dipyridin-2-yl-[4-(2-pyridin-4-yl-vinyl)-phenyl]-amine, 5-NO<sub>2</sub>-1,3-H<sub>2</sub>BDC = 5-nitroisophthalic acid.

H<sub>2</sub>L = 5-(1H-1,2,4-triazol-1-yl)isophthalic acid;

H<sub>4</sub>mtb = 4-[tris(4-carboxyphenyl)methyl]benzoic acid.

**Table S8** Comparison of various CPs sensors for the detection of NFT.

|   | Analyte | CPs-based fluorescent Materials                          | Quenching constant ( $K_{SV}$ , $M^{-1}$ ) | Detection Limits (LOD) | Media              | Ref   |
|---|---------|----------------------------------------------------------|--------------------------------------------|------------------------|--------------------|-------|
| 1 | NFT     | $\{[Cd_3(TDCPB) \cdot 2DMAc] \cdot DMAc \cdot 4H_2O\}_n$ | $1.05 \times 10^5$                         |                        | DMA                | 22(a) |
| 2 |         | $\{[Tb(TATMA)(H_2O) \cdot 2H_2O]\}_n$                    | $3.35 \times 10^4$                         |                        | H <sub>2</sub> O   | 22(b) |
| 3 |         | $[Zn(L)_2] \cdot CH_2Cl_2 \cdot CH_3OH$                  | $1.58 \times 10^4$                         |                        | CH <sub>3</sub> OH | 22(c) |
| 4 |         | $[Cd(tptc)_{0.5}(o-bimb)]_n$                             | $3.4 \times 10^4$                          |                        | DMF                | 22(d) |
| 5 |         | $[Cd(H_2tptc)_{0.5}(mbimb)(Cl)]_n$                       | $2.6 \times 10^5$                          |                        | DMF                |       |
| 6 |         | $[TbL \cdot 2H_2O]_n$                                    | $5.26 \times 10^4$                         |                        | H <sub>2</sub> O   | 22(e) |
| 7 |         | $[Zn_2(azdc)_2(dpta)] \cdot (DMF)_4$                     | $7.14 \times 10^4$                         |                        | DMF                | 22(f) |

TADA = 3,3'-((6-hydroxy-1,3,5-triazine-2,4-diyl)bis(azanediyl))dibenzoate;

H<sub>3</sub>L = 4-(2,4,6-tricarboxyl phenyl)-2,2':6',2''- terpyridine;

H<sub>3</sub>L = 5-(4-carboxy-phenoxy-methyl)-isophthalic acid;

H<sub>2</sub>NDC= 1,4-naphthalenedicarboxylic acid;

H<sub>3</sub>TATMA= 4, 4',4''-s-triazine-1,3,5-triyltri-m-aminobenzoate.

**Table S9** HOMO and LUMO energy levels of selected antibiotics and H<sub>4</sub>L calculated by density functional theory (DFT) at B<sub>3</sub>LYP/6-31G\*\* level.

|                  | <b>HOMO (eV)</b> | <b>LUMO (eV)</b> | <b>Band Gap (eV)</b> |
|------------------|------------------|------------------|----------------------|
| NFT              | -6.70            | -3.12            | 3.58                 |
| DTZ              | -6.93            | -2.32            | 4.61                 |
| SDZ              | -6.20            | -1.02            | 5.18                 |
| CAP              | -7.24            | -2.52            | 4.72                 |
| PCL              | -6.49            | -0.50            | 5.99                 |
| H <sub>4</sub> L | -6.88            | -2.53            | 4.35                 |

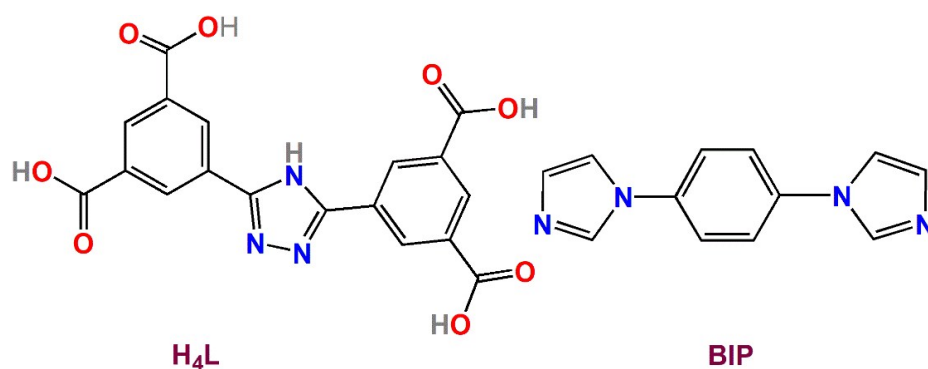

**Scheme S1** Schematic drawing of the ligands  $H_4L$  and  $BIP$ .

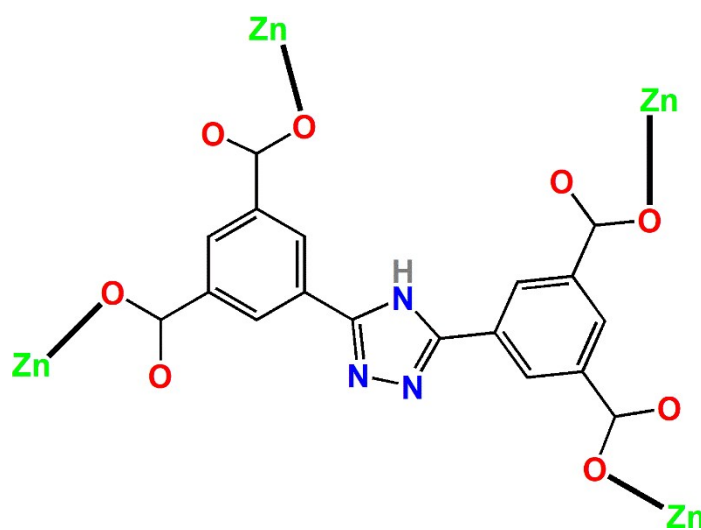

**Scheme S2** The coordination mode of  $L^4$  ligand.

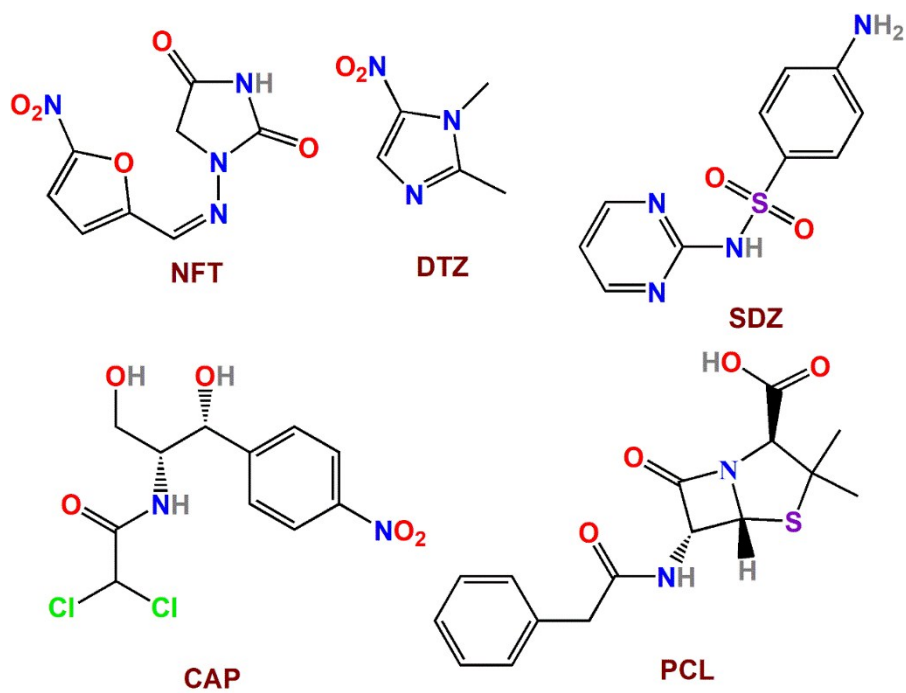

**Scheme S3** The structures of selected antibiotics.

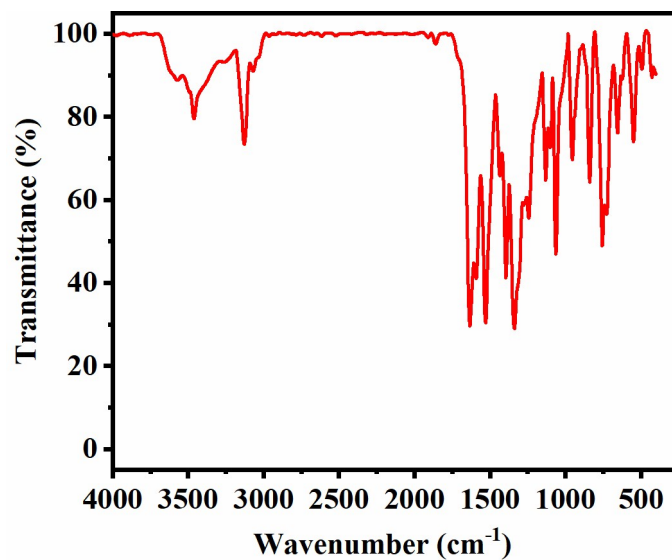

Figure S1 The IR spectra of 1.

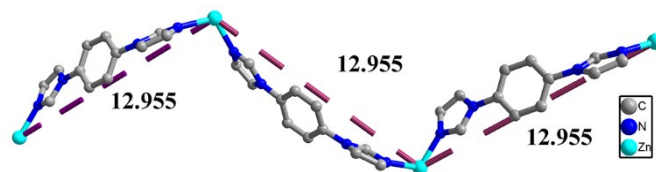

Figure S2 The 1D [Zn(BIP)]<sub>n</sub> chain in 1.

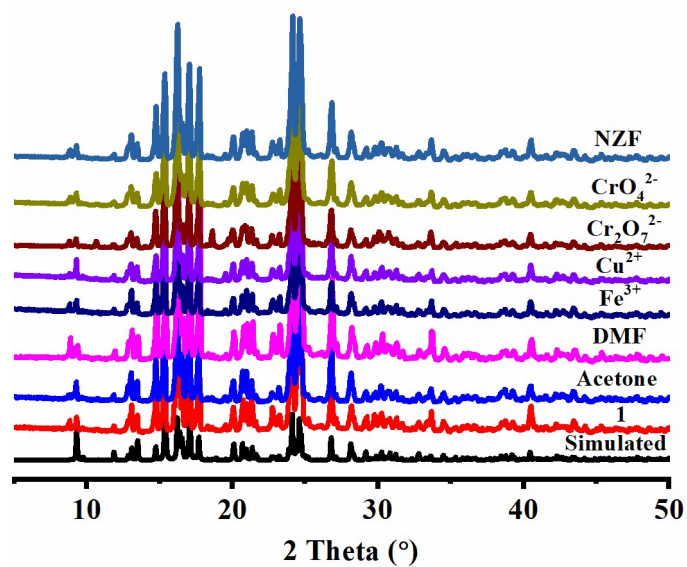

Figure S3 The PXRD patterns of 1 before and after sensing tests.

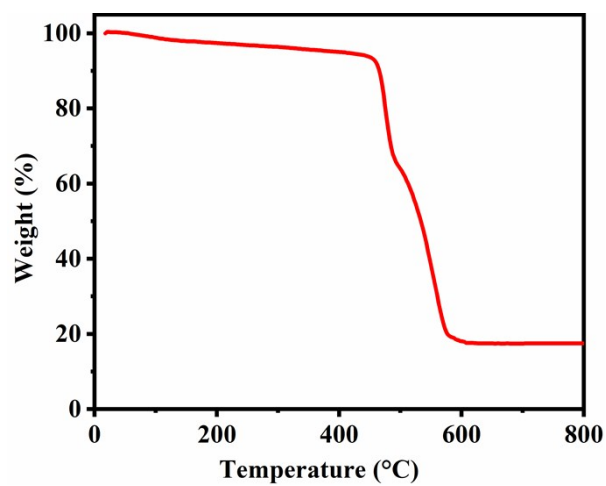

**Figure S4** The TG curve of **1**.

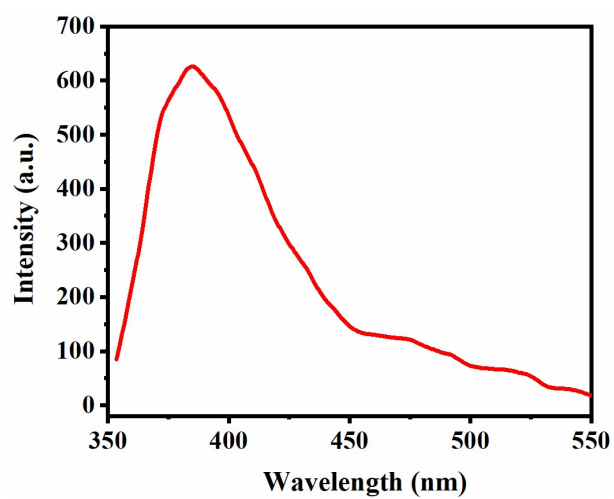

**Figure S5** The solid state fluorescent emission spectra for **1**.



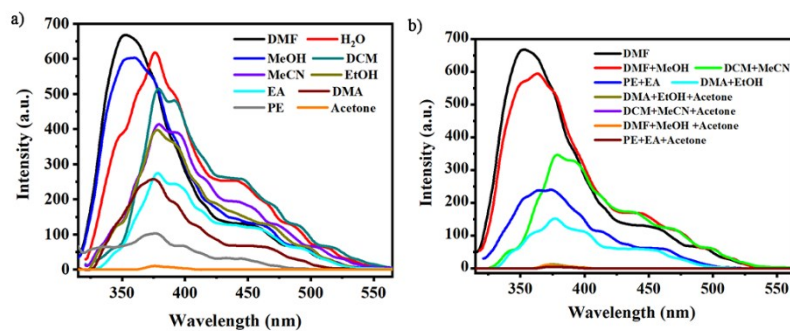

**Figure S6** (a) Emission spectra of **1** dispersed different solvent; (b) Emission spectra of **1** with different mixed solvents added acetone.

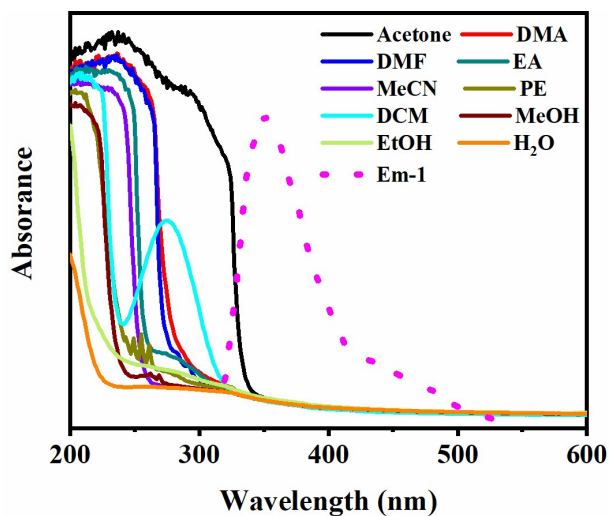

**Figure S7** UV-vis spectra of different solvent and the emission spectra of **1** in DMF solution.

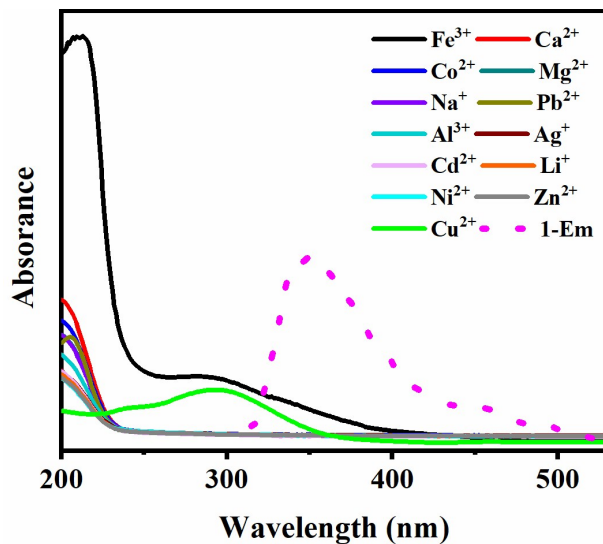

**Figure S8** UV-vis spectra of different metal cations and the emission spectra of **1** in DMF solution.

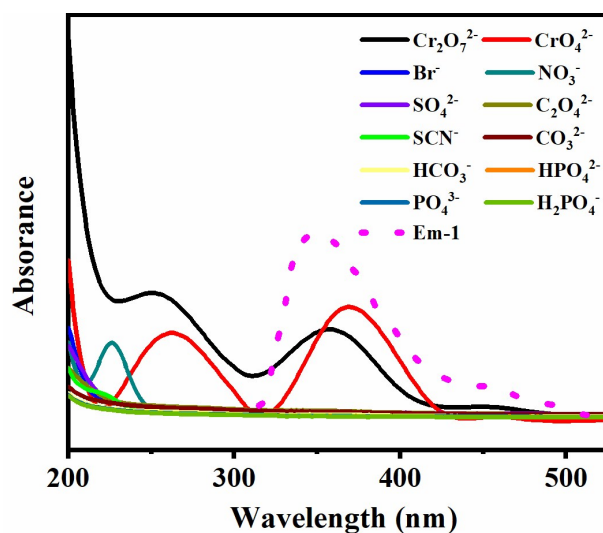

**Figure S9** UV-vis spectra of different anions and the emission spectra of **1** in DMF solution.

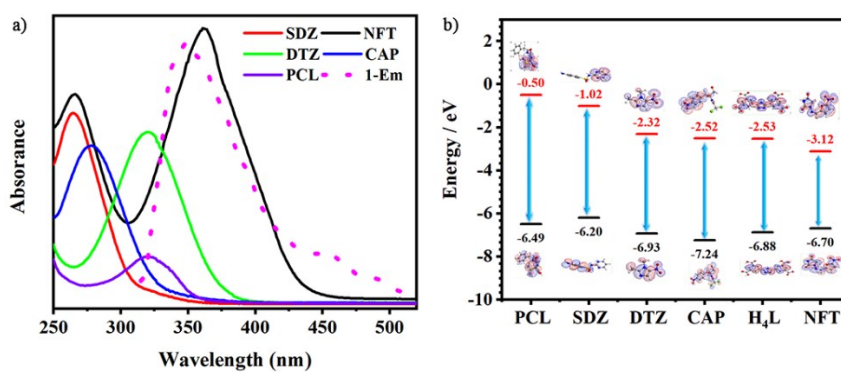

**Figure S10** (a) UV-vis spectra of different antibiotics and the emission spectra of **1** in DMF solution; (b) The HOMO and LUMO energy levels for different antibiotics.
